# Supplementary material for: Absence of July Phenomenon in Acute Ischemic Stroke Care Quality and Outcomes
Source: PubMed Central journal article supplement — J Am Heart Assoc. 2018 Jan 31;7(3):e007685. doi: 10.1161/JAHA.117.007685 (PMC5850252; doi:10.1161/jaha.117.007685), 2018-01-31
Supplement: JAH3-7-e007685-s001.pdf [file JAH3-7-e007685-s001.pdf]

# **SUPPLEMENTAL MATERIAL**

**Table S1. Get-With-The-Guidelines Participating Hospitals by Teaching Status.**

| <b>Variable</b>                      | <b>Level</b>   | <b>Overall<br/>N=967891</b> | <b>Teaching Hospitals<br/>N=564472</b> | <b>Non-Teaching<br/>Hospitals<br/>N=403419</b> |
|--------------------------------------|----------------|-----------------------------|----------------------------------------|------------------------------------------------|
| Region (%)                           | West           | 18.65                       | 15.06                                  | 23.68                                          |
|                                      | South          | 36.49                       | 30.78                                  | 44.49                                          |
|                                      | Midwest        | 18.62                       | 22.12                                  | 13.72                                          |
|                                      | Northeast      | 26.24                       | 32.05                                  | 18.11                                          |
| Teaching Hospital                    | Yes            | 58.32                       | 100                                    | 0                                              |
| Number of beds                       | Median (Q1-Q3) | 355 (244 – 533)             | 450 (325 – 639)                        | 268 (186 - 367)                                |
| PSC status                           | Yes            | 49.68                       | 53.56                                  | 44.25                                          |
| Annual IS admissions                 | Median (Q1-Q3) | 213.26 (144.80 – 321.94)    | 261.23 (171.32 – 366.91)               | 173.33 (122.48 – 239.79)                       |
| Annual tPA administration            | Median (Q1-Q3) | 15.53 (8.89 – 25.48)        | 19.35 (10.84 - 29.58)                  | 11.70 (6.92 - 18.67)                           |
| % tPA given out of all IS admissions | Median (Q1-Q3) | 7.69 (5.00 – 11.03)         | 8.44 (5.84 – 12.15)                    | 6.70 (4.02 – 9.60)                             |

PSC: primary stroke center. IS: ischemic stroke. rtPA: recombinant tissue type plasminogen activator
